# Supplementary material for: MARCKS regulates neuritogenesis and interacts with a CDC42 signaling network
Source: PubMed Central journal article supplement (PMC6125478; doi:10.1038/s41598-018-31578-0), 2018-09-05
Supplement: 41598_2018_31578_MOESM1_ESM.pdf [file 41598_2018_31578_MOESM1_ESM.pdf]

## **SUPPLEMENTARY MATERIALS for**

**MARCKS regulates neuritogenesis and interacts with a CDC42 signaling network.**

Brudvig JJ, Cain JT, Sears RM, Schmidt-Grimminger GG, Wittchen ES, Ghashghaei HT, Adler KB, Weimer JM\*

\*Corresponding Author. [Jill.Weimer@sanfordhealth.org](mailto:Jill.Weimer@sanfordhealth.org). (605) 312-6407.



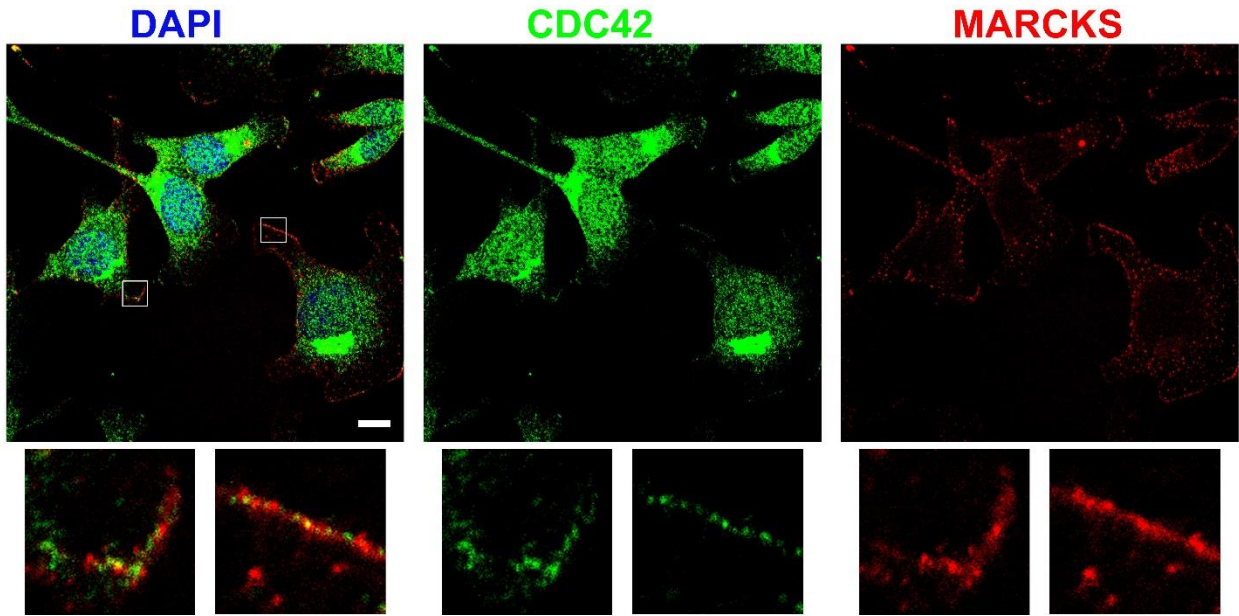

**Supplemental Figure 2. MARCKS and CDC42 co-localize at the edge of the plasma membrane.**

Primary mouse fibroblasts fluorescently labeled with CDC42 (green), MARCKS (red), and DAPI (blue) and imaged at 100x (scalebar = 10um), show colocalization at the plasma membrane.

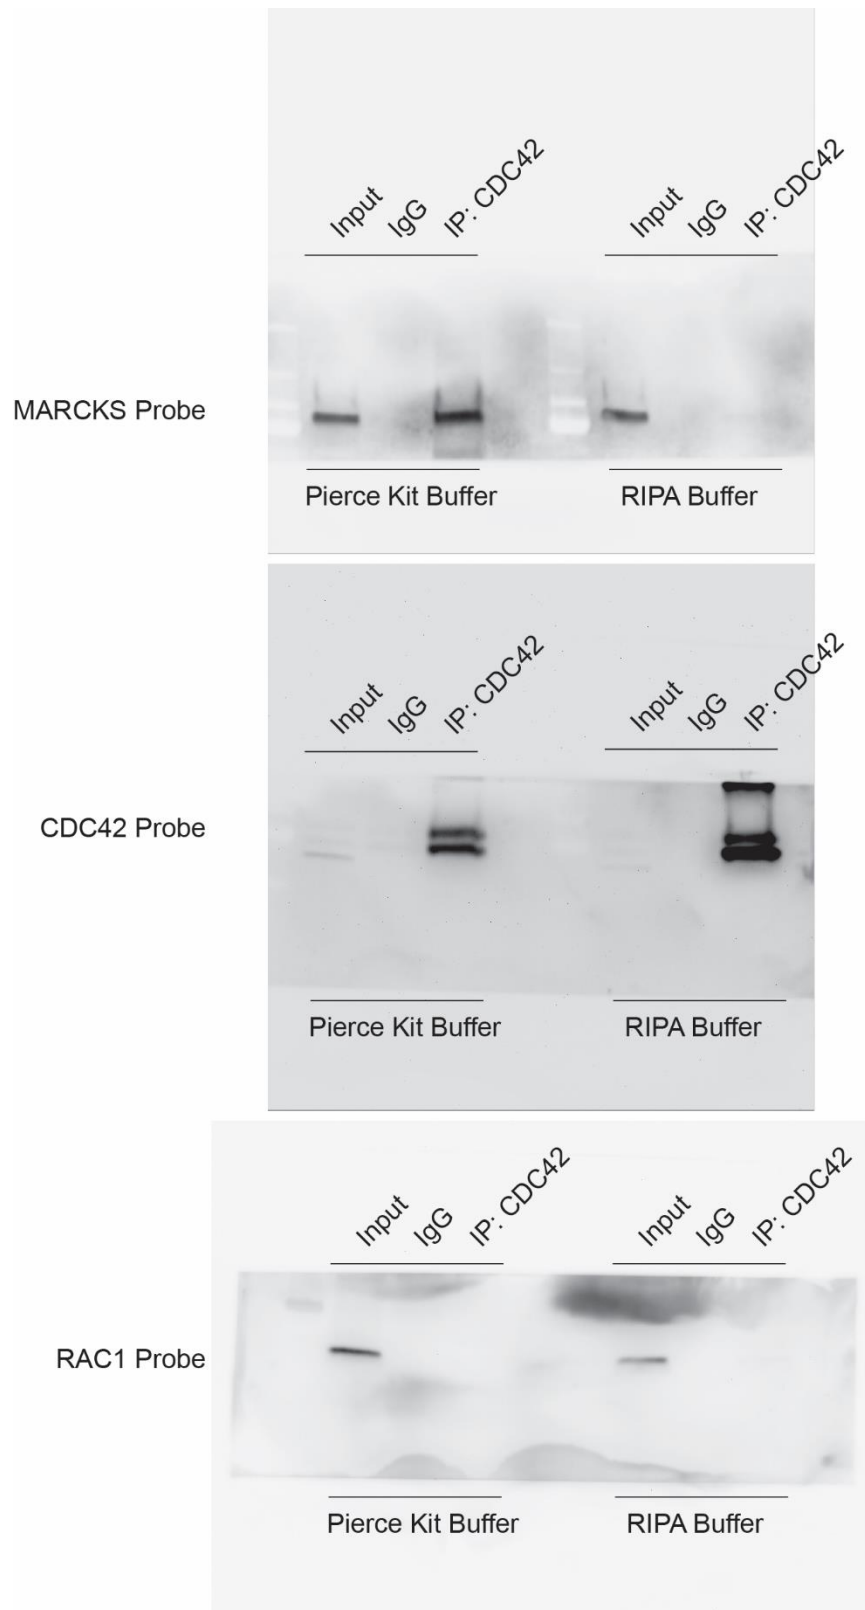

Uncropped Western Blot Images from Figure 5d



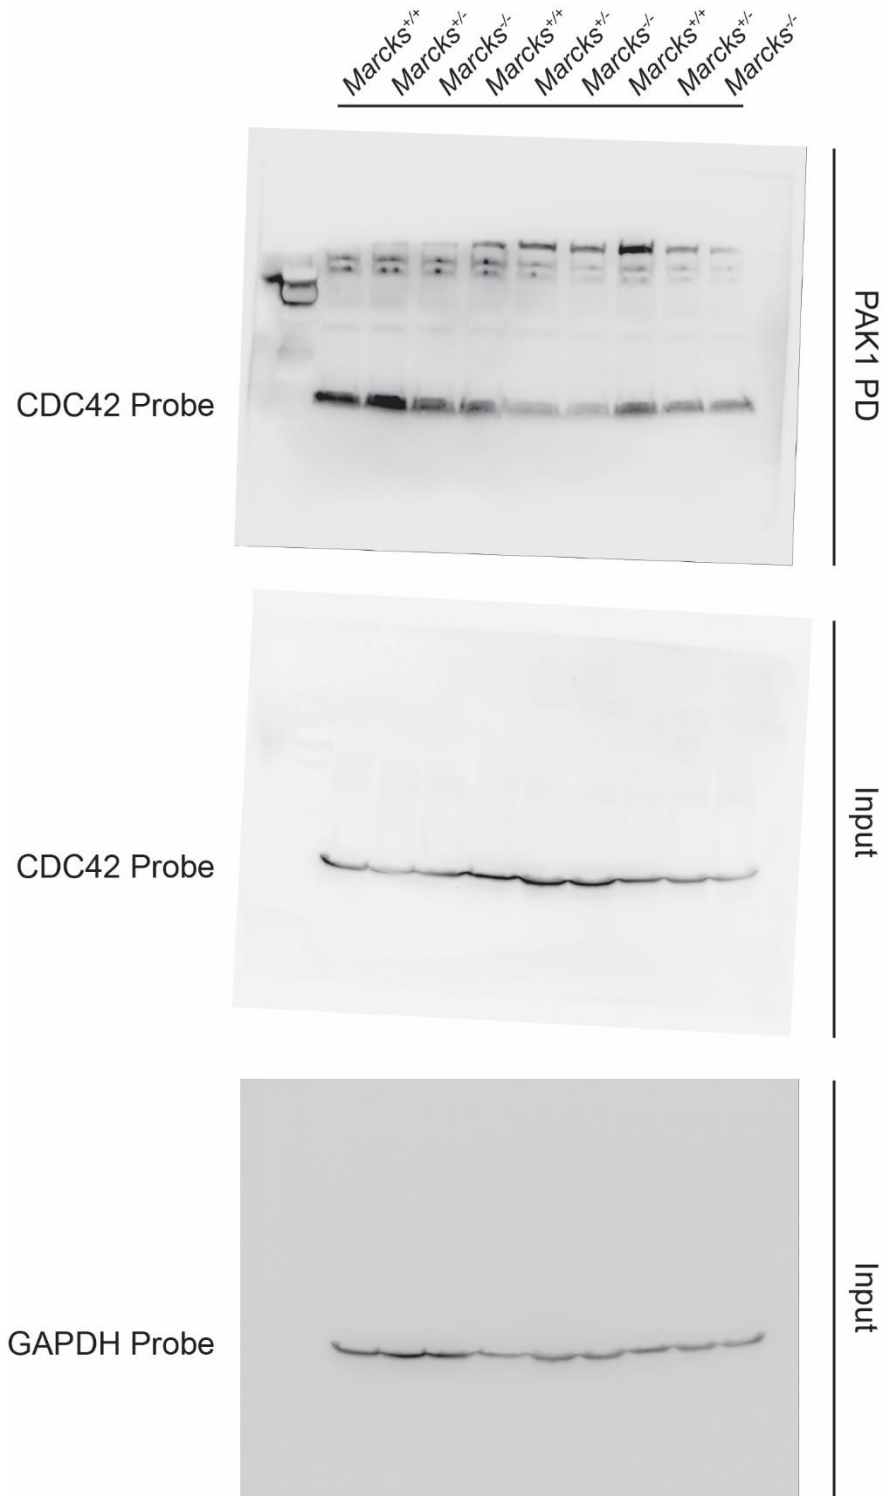

Uncropped Western Blot Images from Figure 5e
